# Supplementary material for: First principles studies on the adsorption of rare base-pairs on the surface of B/N atom doped γ-graphyne
Source: Royal Society of Chemistry journal article supplement (doi:10.1039/d3cp04726a), 2024-01-01
Supplement: d3cp04726a1.pdf [file d3cp04726a1.pdf]

## Supporting Information

### Adsorption of Rare Base-pairs on Surface of B/N Atom Doped $\gamma$ -graphyne from First Principles

Ruirui Li Xia Zeng Mengdan Lv Ruiying Zhang Shengrui Zhang Tianlei Zhang Xiaohu Yu

Chen Li Lingxia Jin\* Caibin Zhao\*

Shaanxi Key Laboratory of Catalysis, School of Chemical & Environment Science, Shaanxi  
University of Technology, Hanzhong 723001

---

\* Corresponding authors. Tel: +86-916-2641660; e-mail: [jinx@snut.edu.cn](mailto:jinx@snut.edu.cn) (L.X. Jin); e-mail: [zhaocb@snut.edu.cn](mailto:zhaocb@snut.edu.cn)  
C. B. Zhao).

**Fig. S1** Optimized configurations of the rare base-pairs on the B/N-doped on  $\gamma$ -GY nanosheet. (G-5-meCyt; G-5-hmCyt; G-5-caCyt; G-5-fCyt) Note that same color represents each atom is used for all of the graphics throughout the article.

**Fig. S2** The CDD plots (isosurface value is  $0.0003e/\text{\AA}$ ) of the base-pairs and rare base-pairs on the B-doped  $\gamma$ -GY nanosheet. (a: G-Cyt absorbed on B-doped  $\gamma$ -GY; b: G-5-meCyt absorbed on B-doped  $\gamma$ -GY; c: G-5-hmCyt absorbed on B-doped  $\gamma$ -GY; d: G-5-caCyt absorbed on B-doped  $\gamma$ -GY; e: G-5-fCyt absorbed on B-doped  $\gamma$ -GY).

**Fig. S3** The CDD plots (isosurface value is  $0.0003e/\text{\AA}$ ) of the base-pairs and rare base-pairs on the N-doped  $\gamma$ -GY nanosheet. (a: G-Cyt absorbed on N-doped  $\gamma$ -GY; b: G-5-meCyt absorbed on N-doped  $\gamma$ -GY; c: G-5-hmCyt absorbed on N-doped  $\gamma$ -GY; d: G-5-caCyt absorbed on N-doped  $\gamma$ -GY; e: G-5-fCyt absorbed on N-doped  $\gamma$ -GY).

**Fig. S4** The Band structures of B-doped  $\gamma$ -GY and rare base-pairs on B-doped  $\gamma$ -GY nanosheet. (a: pure B-doped  $\gamma$ -GY; b: G-5-meCyt absorbed on B-doped  $\gamma$ -GY; c: G-5-hmCyt absorbed on B-doped  $\gamma$ -GY; d: G-5-caCyt absorbed on B-doped  $\gamma$ -GY; e: G-5-fCyt absorbed on B-doped  $\gamma$ -GY)

**Fig. S5** The PDOS of B-doped  $\gamma$ -GY, base-pairs and rare base-pairs on B-doped  $\gamma$ -GY nanosheet (a: pure B-doped  $\gamma$ -GY; b: G-Cyt absorbed on B-doped  $\gamma$ -GY; c: G-5-meCyt absorbed on B-doped  $\gamma$ -GY; d: G-5-hmCyt absorbed on B-doped  $\gamma$ -GY; e: G-5-caCyt absorbed on B-doped  $\gamma$ -GY; f: G-5-fCyt absorbed on B-doped  $\gamma$ -GY).

**Fig. S6** The Band structures of N-doped  $\gamma$ -GY, base-pairs and rare base-pairs on N-doped  $\gamma$ -GY nanosheet. (a: pure N-doped  $\gamma$ -GY; b: G-5-meCyt absorbed on N-doped  $\gamma$ -GY; c: G-5-hmCyt absorbed on N-doped  $\gamma$ -GY; d: G-5-caCyt absorbed on N-doped  $\gamma$ -GY; e: G-5-fCyt absorbed on N-doped  $\gamma$ -GY)

**Fig. S7** The PDOS of N-doped  $\gamma$ -GY, base-pairs and rare base-pairs on N-doped  $\gamma$ -GY nanosheet. (a: pure N-doped  $\gamma$ -GY; b: G-Cyt absorbed on N-doped  $\gamma$ -GY; c: G-5-meCyt absorbed on N-doped  $\gamma$ -GY; d: G-5-hmCyt absorbed on N-doped  $\gamma$ -GY; e: G-5-caCyt absorbed on N-doped  $\gamma$ -GY; f: G-5-fCyt absorbed on N-doped  $\gamma$ -GY).

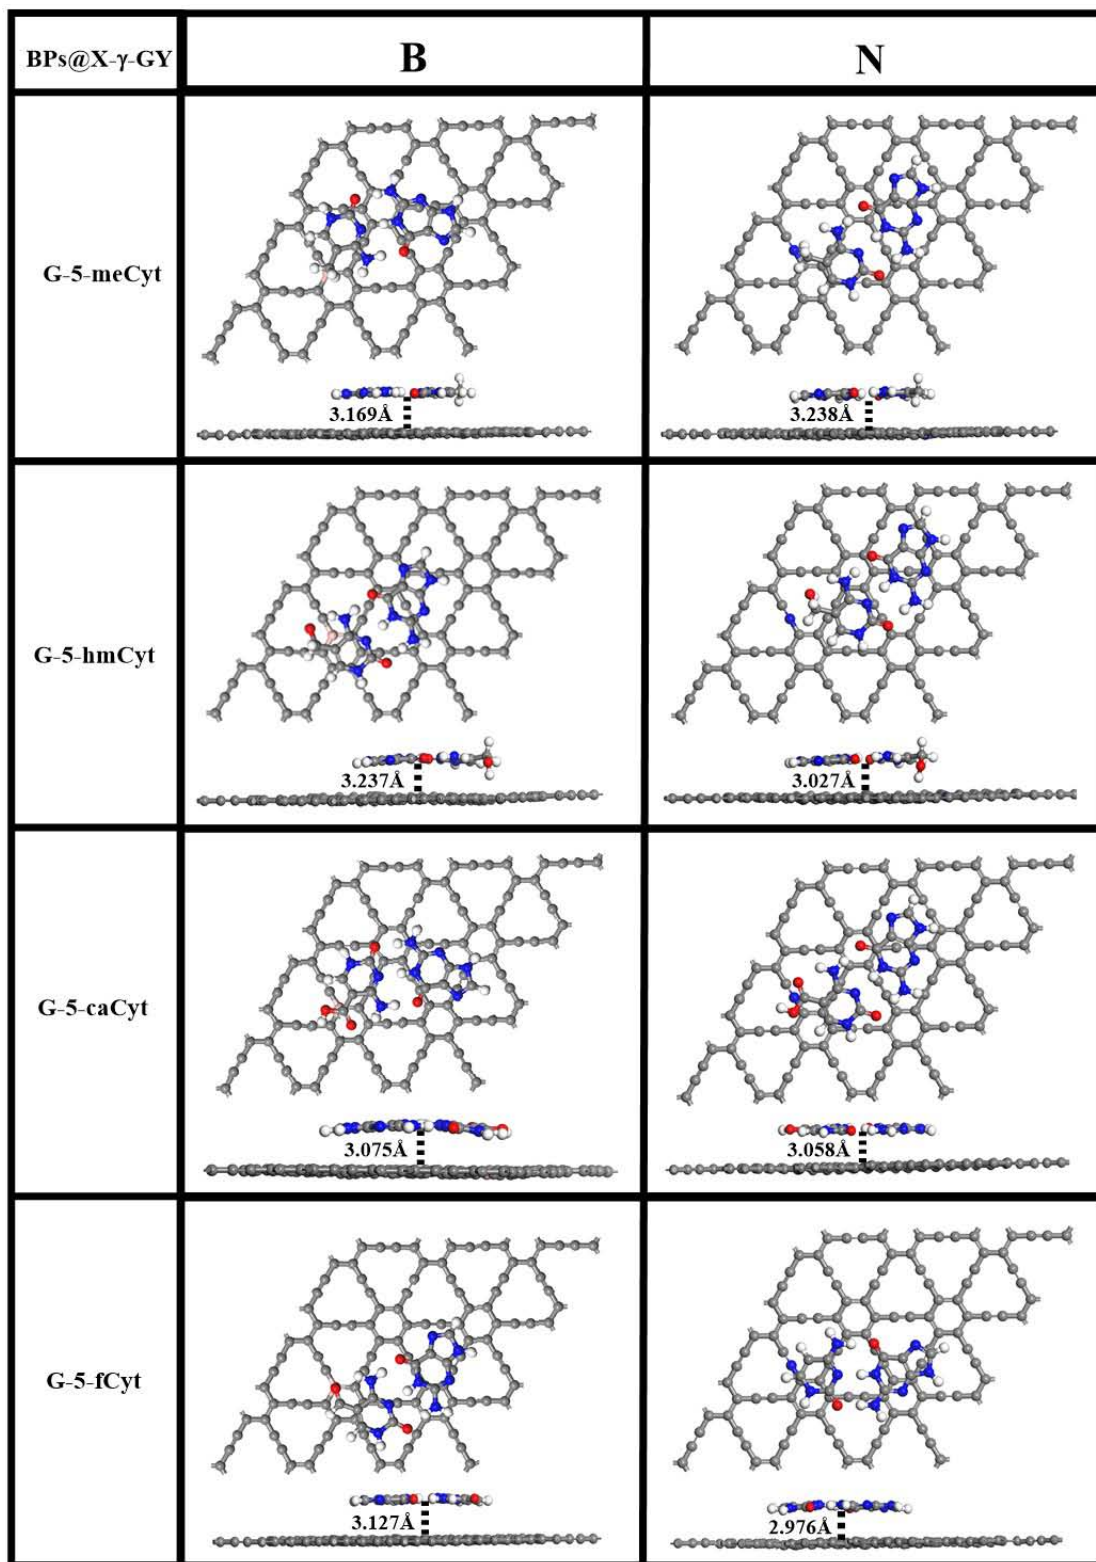

Fig. S1

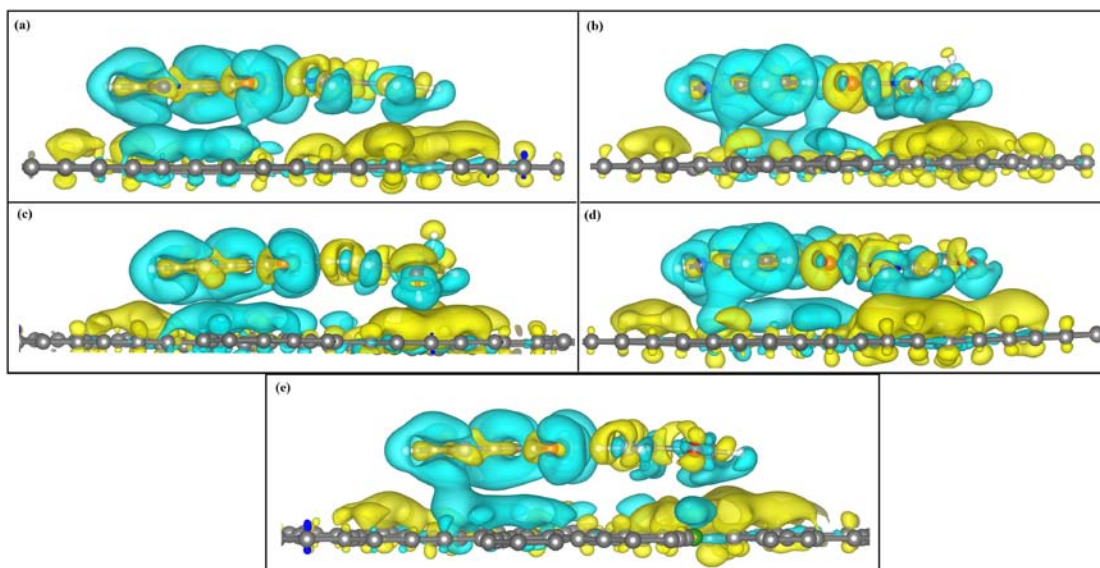

Fig. S2

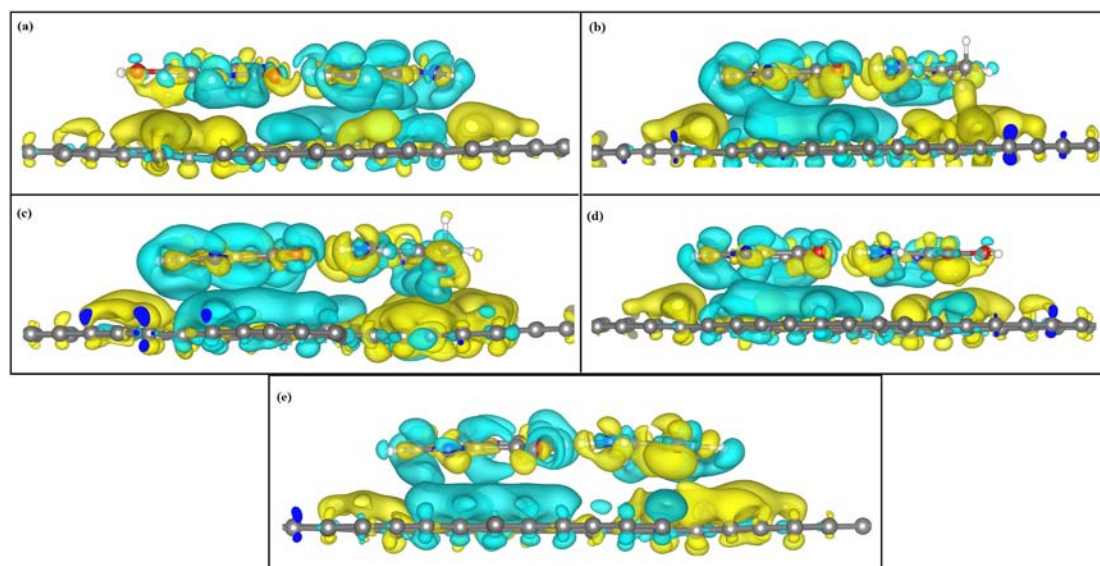

Fig. S3

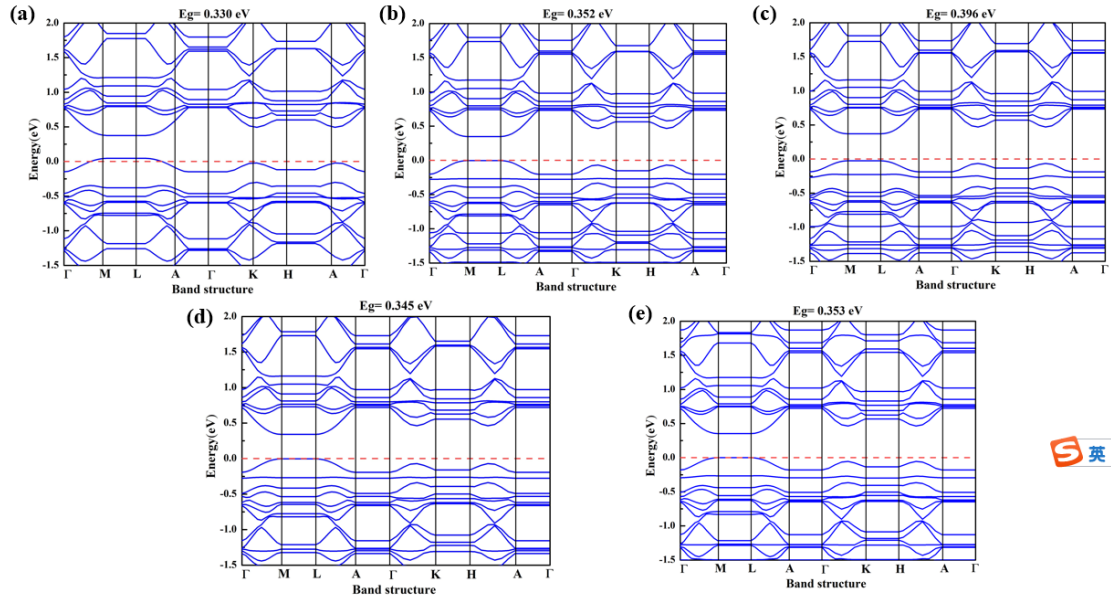

Fig. S4

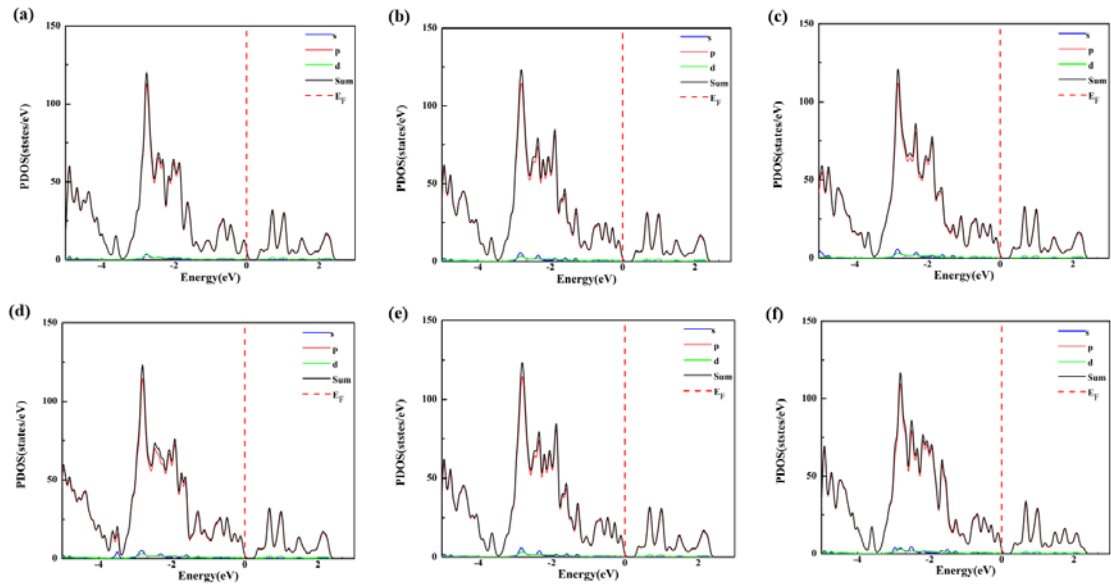

Fig. S5

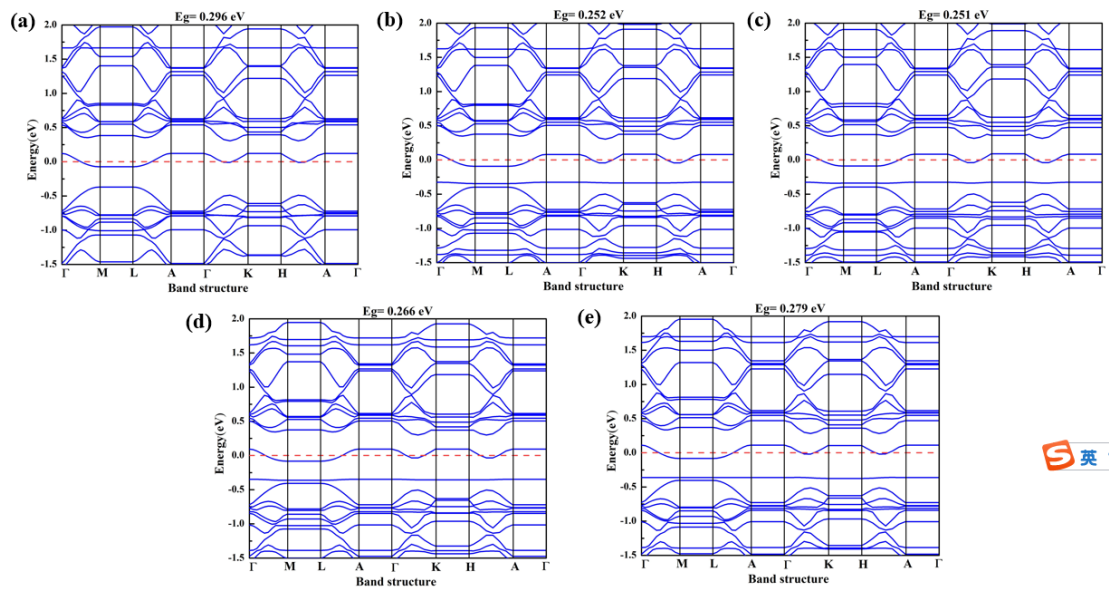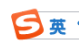

Fig. S6

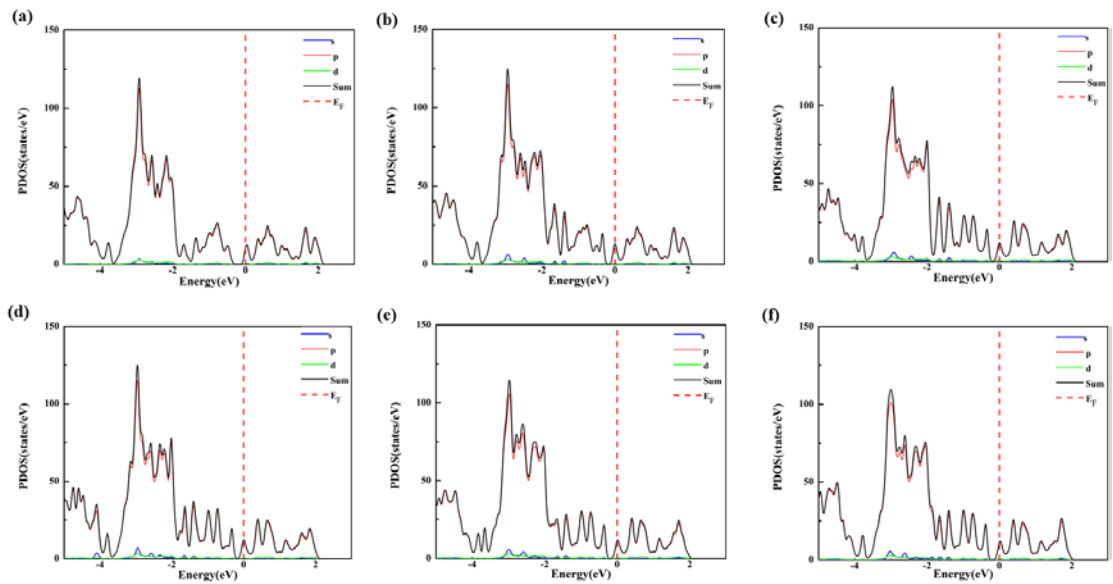

Fig. S7
